# Supplementary material for: Strain-induced catalytic enhancement in Co-BTA and Rh-BTA for efficient 2e− oxygen reduction: a DFT study
Source: Royal Society of Chemistry journal article supplement (doi:10.1039/d4cp01082e), 2024-01-01
Supplement: d4cp01082e1.pdf [file d4cp01082e1.pdf]

1 **Supporting Information**

2

3 **Strain-Induced Catalytic Enhancement in Co-BTA and Rh-BTA for**  
4 **Efficient 2e<sup>-</sup> Oxygen Reduction: A DFT Study**

5 Ran Tao<sup>1</sup>, Cheng Liu<sup>1†</sup>, Weihua Ning<sup>1†</sup>, Youyong Li<sup>1,2†</sup>

6 <sup>1</sup>Institute of Functional Nano & Soft Materials (FUNSOM), Jiangsu Key Laboratory  
7 for Carbon-Based Functional Materials and Devices, Soochow University, Suzhou  
8 215123, China.

9 <sup>2</sup>Macao Institute of Materials Science and Engineering, Macau University of Science  
10 and Technology, Taipa 999078, Macau SAR, China

11

12 † Corresponding authors.

13 E-mail: [liucheng@suda.edu.cn](mailto:liucheng@suda.edu.cn) Tel: (86)-0512-65882037

14 Email: [whning@suda.edu.cn](mailto:whning@suda.edu.cn) Tel: (86)-0512-65882037

15 E-mail: [yyli@suda.edu.cn](mailto:yyli@suda.edu.cn) Tel: (86)-0512-65882037

16

## 17 **Quantitative Analysis of Bonding Interactions via COHP**

18 In this study, the Crystal Orbital Hamilton Population (COHP) analysis was  
19 employed to gain insights into the nature of interatomic interactions within the material.  
20 COHP offers a quantitative means to assess the bonding or anti-bonding contributions  
21 of chemical bonds.<sup>1</sup> By projecting the expectation values of the Hamiltonian operator  
22 onto the orbitals of specific atom pairs, COHP analysis reveals the distribution of  
23 bonding and anti-bonding states at various energy levels.

24 Specifically, COHP is achieved by analyzing the orbital information obtained  
25 from electronic structure calculations, such as those based on Density Functional  
26 Theory. The COHP for each pair of atoms can be expressed as:

$$27 \text{COHP}_{ij}(E) = - \sum_k P_{ij}^k H_{ij}^k \delta(E - E_k)$$

28 Where  $P_{ij}^k$  and  $H_{ij}^k$  represent the crystal orbital overlap and Hamiltonian matrix  
29 elements, respectively, and  $E_k$  is the corresponding eigenvalue of energy. The  
30 integrated COHP (ICOHP) values quantify the total bonding and anti-bonding  
31 contributions over the entire energy range.

## 32 ***d*-band Center Calculation for Transition Metals**

33 In the present investigation, particular attention was devoted to the position of the  
34 *d*-band center of transition metal surfaces, a key factor in understanding their catalytic  
35 activities. The *d*-band center refers to the weighted average energy position of the *d*-  
36 state electrons in transition metals, significantly influencing surface adsorption  
37 properties and catalytic reactions. According to the theory proposed by Hammer and  
38 Nørskov, the position of the *d*-band center is intimately related to the electronic  
39 structure of adsorption sites on the catalyst surface.<sup>2</sup>

40 The location of the *d*-band center is determined by calculating the energy-weighted  
41 average of the *d*-electron states density on the surface. The calculation formula is as  
42 follows:

$$\epsilon_d = \frac{\int \epsilon D_d(\epsilon) d\epsilon}{\int D_d(\epsilon) d\epsilon}$$

44 where  $\epsilon$  represents the energy and  $D_d(\epsilon)$  is the density of states function for the  $d$ -  
 45 states. The energetic proximity of the  $d$ -band center to the Fermi level dictates the  
 46 strength of the interaction between the metal surface and the adsorbed molecules.  
 47 Typically, the closer the  $d$ -band center is to the Fermi level, the stronger the interaction  
 48 with the adsorbate.

49  
 50  
 51

52 **Table S1** Free energy of TM-BTA with the adsorption of \*OOH.

| Type | E <sub>total</sub> (eV) | G <sub>corr</sub> (eV) | G <sub>total</sub> (eV) |
|------|-------------------------|------------------------|-------------------------|
| Sc   | -253.204                | 0.329                  | -252.875                |
| Ti   | -254.842                | 0.384                  | -254.458                |
| V    | -254.860                | 0.363                  | -254.498                |
| Cr   | -255.011                | 0.319                  | -254.692                |
| Mn   | -253.387                | 0.334                  | -253.053                |
| Fe   | -250.774                | 0.333                  | -250.441                |
| Co   | -247.827                | 0.321                  | -247.506                |
| Ni   | -244.173                | 0.288                  | -243.886                |
| Ru   | -250.657                | 0.292                  | -250.365                |
| Rh   | -247.091                | 0.336                  | -246.760                |
| Pd   | -242.430                | 0.252                  | -242.178                |
| Pt   | -245.020                | 0.257                  | -244.763                |

53

54 **Table S2** Values of  $d$ -Band Centers for Co-BTA and Rh-BTA under varied strain  
 55 conditions.

| Strain | -1.95% | -1.30% | -0.65% | 0.00% | +0.65% | +1.30% | +1.95% |
|--------|--------|--------|--------|-------|--------|--------|--------|
|        |        |        |        |       |        |        |        |

|    |        |        |        |        |        |        |        |
|----|--------|--------|--------|--------|--------|--------|--------|
| Co | -1.846 | -1.775 | -1.789 | -1.746 | -1.783 | -1.743 | -1.735 |
| Rh | -1.713 | -1.606 | -1.538 | -1.457 | -1.509 | -1.457 | -1.464 |

56

57 **Table S3** Under different strain conditions, the average bond length (Å) between the  
58 metal center atom and the surrounding coordination atoms before and after \*OOH  
59 adsorption.

| Type | -1.95%        | -1.30% | -0.65% | 0.0%  | +0.65% | +1.30% | +1.95% |
|------|---------------|--------|--------|-------|--------|--------|--------|
| Sc   | N-M           | 2.092  | 2.101  | 2.113 | 2.121  | 2.128  | 2.141  |
|      | N-<br>M(*OOH) | 2.204  | 2.210  | 2.209 | 2.237  | 2.227  | 2.234  |
| Ti   | N-M           | 2.003  | 1.982  | 1.989 | 1.996  | 2.004  | 2.044  |
|      | N-<br>M(*OOH) | 2.049  | 2.044  | 2.039 | 2.047  | 2.043  | 2.055  |
| Cr   | N-M           | 1.942  | 1.968  | 1.981 | 1.993  | 2.007  | 2.020  |
|      | N-<br>M(*OOH) | 1.967  | 1.981  | 1.981 | 1.987  | 2.007  | 2.019  |
| Mn   | N-M           | 1.894  | 1.903  | 1.912 | 1.920  | 1.928  | 1.939  |
|      | N-<br>M(*OOH) | 1.925  | 1.923  | 1.928 | 1.935  | 1.944  | 1.953  |
| Fe   | N-M           | 1.847  | 1.861  | 1.872 | 1.879  | 1.887  | 1.899  |
|      | N-<br>M(*OOH) | 1.892  | 1.890  | 1.892 | 1.898  | 1.907  | 1.918  |
| Co   | N-M           | 1.819  | 1.827  | 1.836 | 1.845  | 1.855  | 1.865  |
|      | N-<br>M(*OOH) | 1.866  | 1.867  | 1.867 | 1.872  | 1.881  | 1.892  |
| Ni   | N-M           | 1.822  | 1.830  | 1.841 | 1.849  | 1.858  | 1.868  |
|      | N-<br>M(*OOH) | 1.837  | 1.845  | 1.855 | 1.865  | 1.874  | 1.885  |
| Rh   | N-M           | 1.945  | 1.953  | 1.966 | 1.973  | 1.985  | 1.996  |
|      | N-<br>M(*OOH) | 1.992  | 1.991  | 1.991 | 1.997  | 2.008  | 2.025  |
| Pd   | N-M           | 1.965  | 1.974  | 1.985 | 1.994  | 2.002  | 2.013  |
|      | N-<br>M(*OOH) | 1.969  | 1.978  | 1.988 | 1.999  | 2.009  | 2.021  |
| Pt   | N-M           | 1.968  | 1.976  | 1.987 | 1.994  | 2.002  | 2.013  |
|      | N-<br>M(*OOH) | 1.977  | 1.982  | 1.990 | 1.999  | 2.010  | 2.019  |

60

61 **Table S4.** The calculated formation energies ( $\Delta E_{\text{form}}$ ) of Ni-, Co-, and Rh-BTA.

| Type                          | Ni-BTA | Co-BTA | Rh-BTA |
|-------------------------------|--------|--------|--------|
| $\Delta E_{\text{form}}$ (eV) | -4.246 | -4.956 | -4.478 |

62

63 The corresponding formation energy calculation formula is stated as follows:

$$\Delta E_{\text{form}} = E_{\text{TM-BTA}} - E_{\text{BTA}} + 2E_{\text{H}_2} - \mu_{\text{TM}}^0$$

64

65

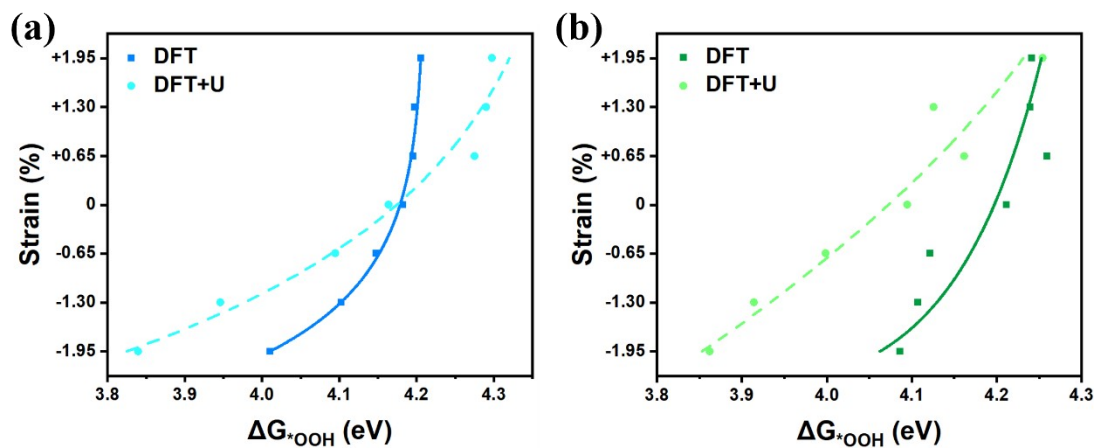

66

67 **Fig. S1.** Plot of the relationship between  $\Delta G^*_{\text{OOH}}$  values and the dependent variable  
68 obtained by studying the DFT and DFT+U methods, (a) Co-BTA, (b) Rh-BTA. In view  
69 of the fact that Co and Rh are elements of the same main group and have similar  
70 properties, the same U value of 3.42 eV was used for correction, and the corresponding  
71 U value was taken from Reference 3.

72

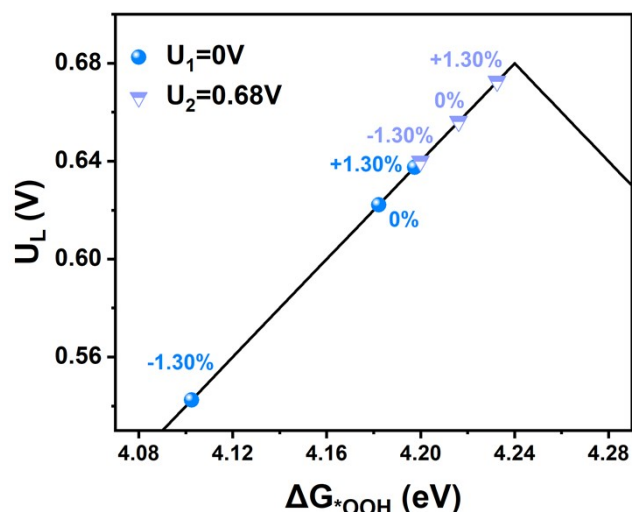

73

74 **Fig. S2.** Trend of the limiting potential of Co-BTA as a function of strain at different  
 75 electrode potentials.

76

#### 77 **Modeling Structure:**

78 The structural model consists of two consecutive units in the long chain of TM-  
 79 BTA, containing 8 nitrogen (N) atoms, 12 carbon (C) atoms, 2 transition metal (TM)  
 80 atoms, and 12 (H) hydrogen atoms. To avert interlayer interactions stemming from the  
 81 model's periodicity, a vacuum layer exceeding 15 Å was implemented. Due to the  
 82 excessive length of the model structure information, we only present the detailed atomic  
 83 coordinates of Co-BTA and Rh-BTA catalysts below, and the structures of other TM-  
 84 BTA are consistent with the above two catalysts. The detailed atomic coordinates  
 85 within the Co-BTA and Rh-BTA structures are presented as follows:

86

87 Co-BTA

88 1.0000000000000000

89 15.3491017285728528 0.0000000000000000 0.0000000000000000

90 0.0000000000000000 15.0000000000000000 0.0000000000000000

91 0.0000000000000000 0.0000000000000000 15.0000000000000000

92 N C Co H

93 8 12 2 12

|     |                    |                    |                    |  |
|-----|--------------------|--------------------|--------------------|--|
| 94  | Direct             |                    |                    |  |
| 95  | 0.0895902379050250 | 0.4991186746333861 | 0.3865148392397993 |  |
| 96  | 0.0895887834221885 | 0.5012397328976045 | 0.5498835635452040 |  |
| 97  | 0.4098006943556209 | 0.4982958718898646 | 0.3865262809346313 |  |
| 98  | 0.4098001216528388 | 0.5004129707827337 | 0.5498950532058443 |  |
| 99  | 0.5895902069050261 | 0.4991186746333861 | 0.3865148392397993 |  |
| 100 | 0.5895887444221890 | 0.5012397328976045 | 0.5498835635452040 |  |
| 101 | 0.9098007253556267 | 0.4982958718898646 | 0.3865262809346313 |  |
| 102 | 0.9098000596528411 | 0.5004129707827337 | 0.5498950532058443 |  |
| 103 | 0.1711729500927192 | 0.5004863898511075 | 0.5173103360165816 |  |
| 104 | 0.2496951073533480 | 0.4983585636293733 | 0.3716685678086143 |  |
| 105 | 0.1711732738492757 | 0.4992387175269557 | 0.4191008214195861 |  |
| 106 | 0.2496928267641682 | 0.5007742693669117 | 0.5647549011889900 |  |
| 107 | 0.3282155322063594 | 0.5000712635554716 | 0.5173169629724071 |  |
| 108 | 0.3282172100167997 | 0.4988248276336688 | 0.4191075844708111 |  |
| 109 | 0.6711729500927193 | 0.5004863898511075 | 0.5173103360165816 |  |
| 110 | 0.7496950913533464 | 0.4983585636293733 | 0.3716685678086143 |  |
| 111 | 0.6711732738492757 | 0.4992387175269557 | 0.4191008214195861 |  |
| 112 | 0.7496927947641655 | 0.5007742693669117 | 0.5647549011889900 |  |
| 113 | 0.8282155322063595 | 0.5000712635554716 | 0.5173169629724071 |  |
| 114 | 0.8282172100167997 | 0.4988248276336688 | 0.4191075844708111 |  |
| 115 | 0.4996944040707945 | 0.4998016422790791 | 0.4682057959301015 |  |
| 116 | 0.9996943720707989 | 0.4998016422790791 | 0.4682057959301015 |  |
| 117 | 0.0851034233706787 | 0.4985115789467765 | 0.3185155831273289 |  |
| 118 | 0.0850903367907922 | 0.5024101604251938 | 0.6178757992400530 |  |
| 119 | 0.2496934025220973 | 0.4973564361431386 | 0.2988732091262277 |  |
| 120 | 0.2496922799568755 | 0.5015350026233641 | 0.6375557946369916 |  |
| 121 | 0.4142919573684221 | 0.4972492176786306 | 0.3185323861921964 |  |
| 122 | 0.4142925183019936 | 0.5011376571367452 | 0.6178934149446138 |  |
| 123 | 0.5851034543706779 | 0.4985115789467765 | 0.3185155831273289 |  |

|     |                     |                     |                     |    |
|-----|---------------------|---------------------|---------------------|----|
| 124 | 0.5850903677907910  | 0.5024101604251938  | 0.6178757992400530  |    |
| 125 | 0.7496934025220974  | 0.4973564361431386  | 0.2988732091262277  |    |
| 126 | 0.7496922479568729  | 0.5015350026233641  | 0.6375557946369916  |    |
| 127 | 0.9142918953684170  | 0.4972492176786306  | 0.3185323861921964  |    |
| 128 | 0.9142925803019987  | 0.5011376571367452  | 0.6178934149446138  |    |
| 129 |                     |                     |                     |    |
| 130 |                     |                     |                     |    |
| 131 |                     |                     |                     |    |
| 132 | Rh-BTA              |                     |                     |    |
| 133 | 1.0000000000000000  |                     |                     |    |
| 134 | 15.8723944742817356 | 0.0000000000000000  | 0.0000000000000000  |    |
| 135 | 0.0000000000000000  | 15.0000000000000000 | 0.0000000000000000  |    |
| 136 | 0.0000000000000000  | 0.0000000000000000  | 15.0000000000000000 |    |
| 137 | N                   | C                   | Rh                  | H  |
| 138 | 8                   | 12                  | 2                   | 12 |
| 139 | Direct              |                     |                     |    |
| 140 | 0.0954818285310498  | 0.4991080770760946  | 0.3844900472014136  |    |
| 141 | 0.0954781254528985  | 0.5012766839198949  | 0.5519068476612741  |    |
| 142 | 0.4039118509360499  | 0.4982466549370634  | 0.3845020481363073  |    |
| 143 | 0.4039127928193034  | 0.5004123177241165  | 0.5519197348671527  |    |
| 144 | 0.5954817975310507  | 0.4991080770760946  | 0.3844900472014136  |    |
| 145 | 0.5954780864528990  | 0.5012766839198949  | 0.5519068476612741  |    |
| 146 | 0.9039118819360560  | 0.4982466549370634  | 0.3845020481363073  |    |
| 147 | 0.9039127308193053  | 0.5004123177241165  | 0.5519197348671527  |    |
| 148 | 0.1735333118752028  | 0.5005044316520921  | 0.5174143176071638  |    |
| 149 | 0.2496950440494412  | 0.4983701250801783  | 0.3719950909446707  |    |
| 150 | 0.1735339421626845  | 0.4992518411569508  | 0.4190007811293734  |    |
| 151 | 0.2496940220437394  | 0.5007827031942313  | 0.5644293280674303  |    |
| 152 | 0.3258565912512599  | 0.5000698454373815  | 0.5174196332427976  |    |
| 153 | 0.3258572071023307  | 0.4988184955120521  | 0.4190057418785815  |    |



|     |                    |                    |                    |
|-----|--------------------|--------------------|--------------------|
| 154 | 0.6735333118752029 | 0.5005044316520921 | 0.5174143176071638 |
| 155 | 0.7496950280494399 | 0.4983701250801783 | 0.3719950909446707 |
| 156 | 0.6735339421626845 | 0.4992518411569508 | 0.4190007811293734 |
| 157 | 0.7496939900437365 | 0.5007827031942313 | 0.5644293280674303 |
| 158 | 0.8258565912512602 | 0.5000698454373815 | 0.5174196332427976 |
| 159 | 0.8258572071023306 | 0.4988184955120521 | 0.4190057418785815 |
| 160 | 0.4996963121292030 | 0.4997956539071644 | 0.4682030661506385 |
| 161 | 0.9996962801292073 | 0.4997956539071644 | 0.4682030661506385 |
| 162 | 0.0935242602477702 | 0.4985199849757916 | 0.3163298219316670 |
| 163 | 0.0935111106643159 | 0.5024709240852789 | 0.6200590122280992 |
| 164 | 0.2496911484120483 | 0.4973632388197735 | 0.2991515852694218 |
| 165 | 0.2496903188952541 | 0.5015425345903327 | 0.6372766798046936 |
| 166 | 0.4058683034479623 | 0.4971741864837921 | 0.3163477184545144 |
| 167 | 0.4058688899794836 | 0.5011152784478171 | 0.6200794394247835 |
| 168 | 0.5935242912477693 | 0.4985199849757916 | 0.3163298219316670 |
| 169 | 0.5935111416643151 | 0.5024709240852789 | 0.6200590122280992 |
| 170 | 0.7496911484120484 | 0.4973632388197735 | 0.2991515852694218 |
| 171 | 0.7496902868952516 | 0.5015425345903327 | 0.6372766798046936 |
| 172 | 0.9058682414479571 | 0.4971741864837921 | 0.3163477184545144 |
| 173 | 0.9058689519794887 | 0.5011152784478171 | 0.6200794394247835 |
| 174 |                    |                    |                    |

## 175 **References**

- 176 1. R. Dronskowski and P. E. Bloechl, *The Journal of Physical Chemistry*, 1993, **97**, 8617-8624.
- 177 2. B. Hammer and J. K. Norskov, *Nature*, 1995, **376**, 238-240.
- 178 3. H. Xu, D. Cheng, D. Cao and X. C. Zeng, *Nature Catalysis*, 2024, **7**, 207-218.
- 179
